# Supplementary material for: Definition of erythroid cell‐positive blood transcriptome phenotypes associated with severe respiratory syncytial virus infection
Source: PubMed Central journal article supplement (PMC7733317; doi:10.1002/ctm2.244), 2020-12-12

# GSE103842

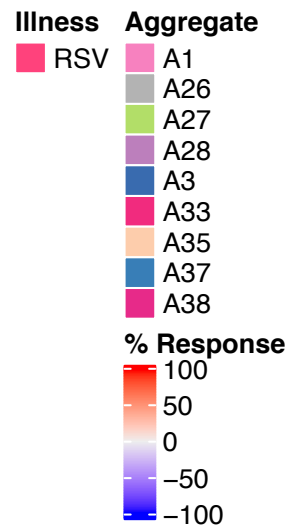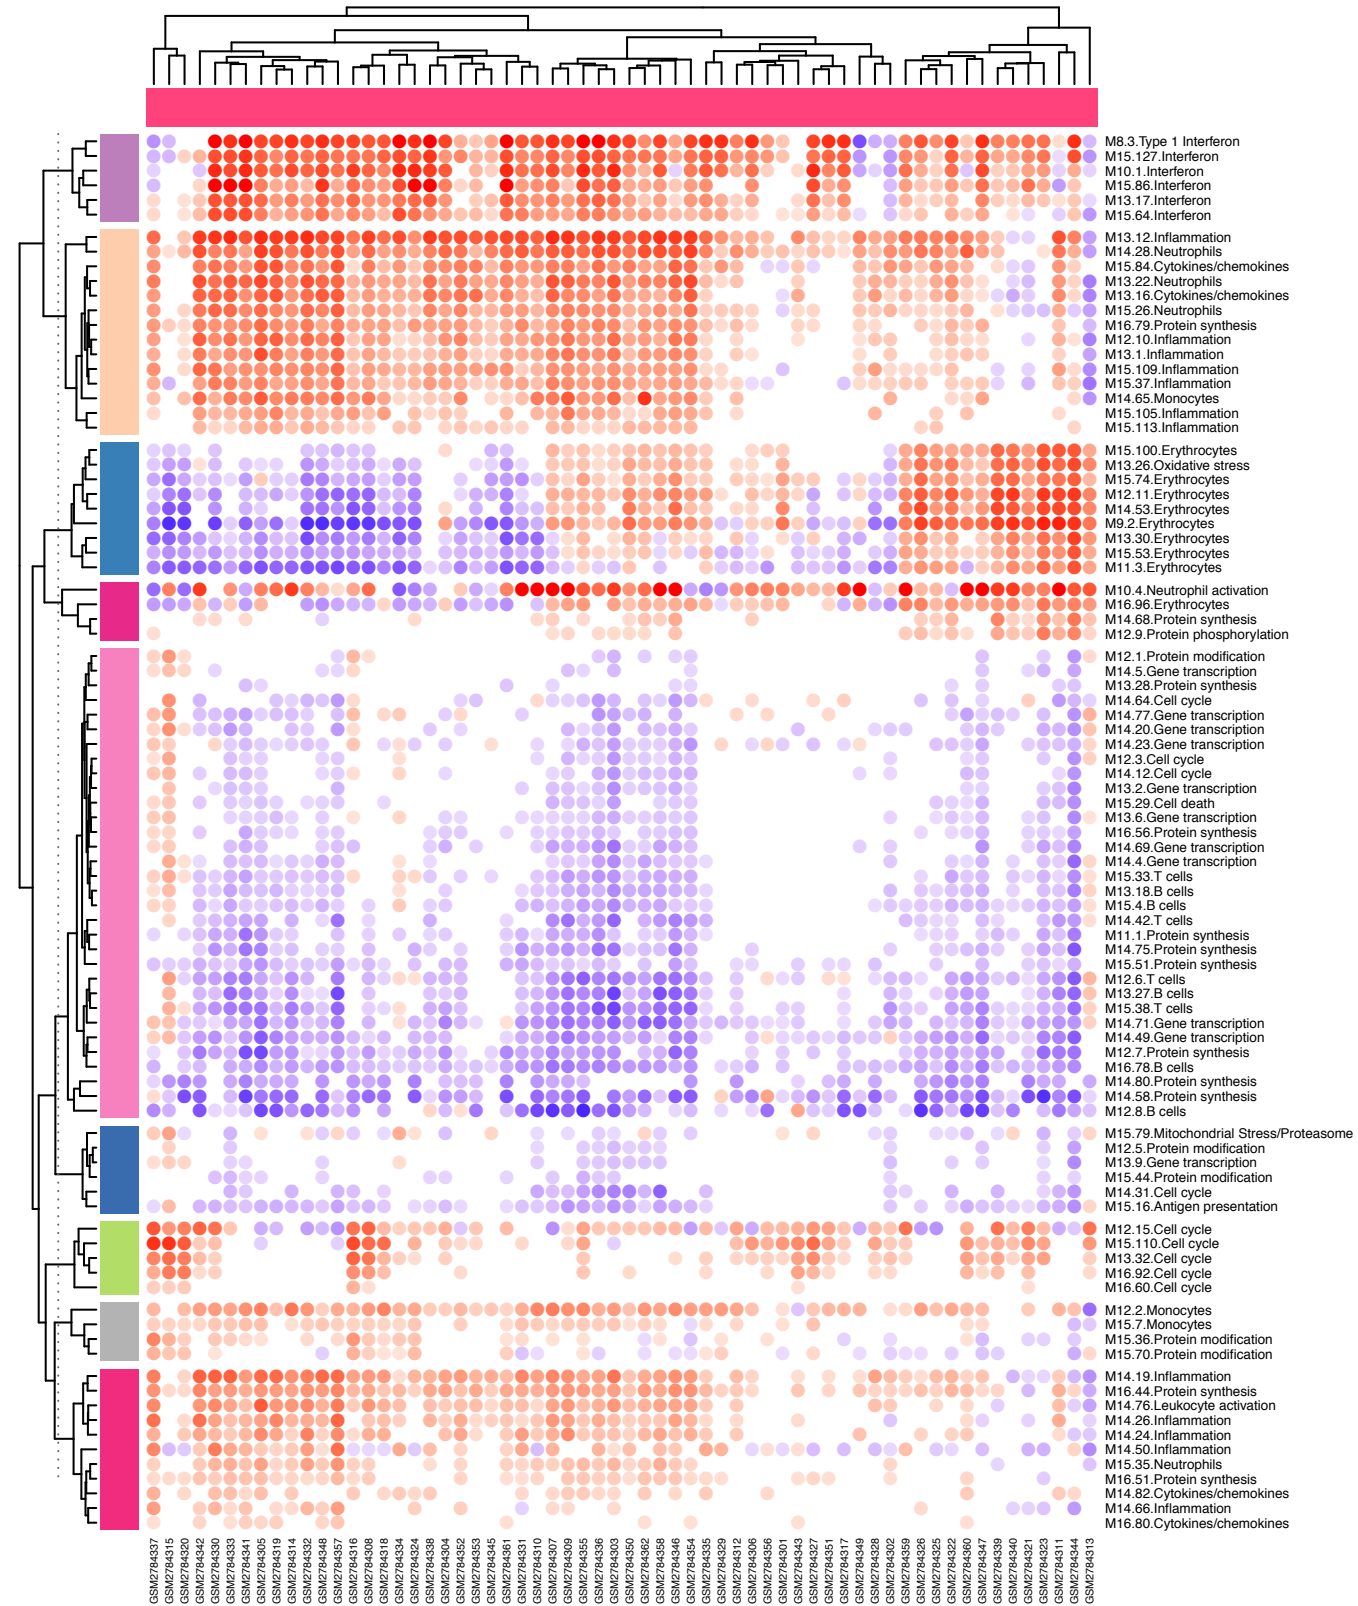

# GSE77087

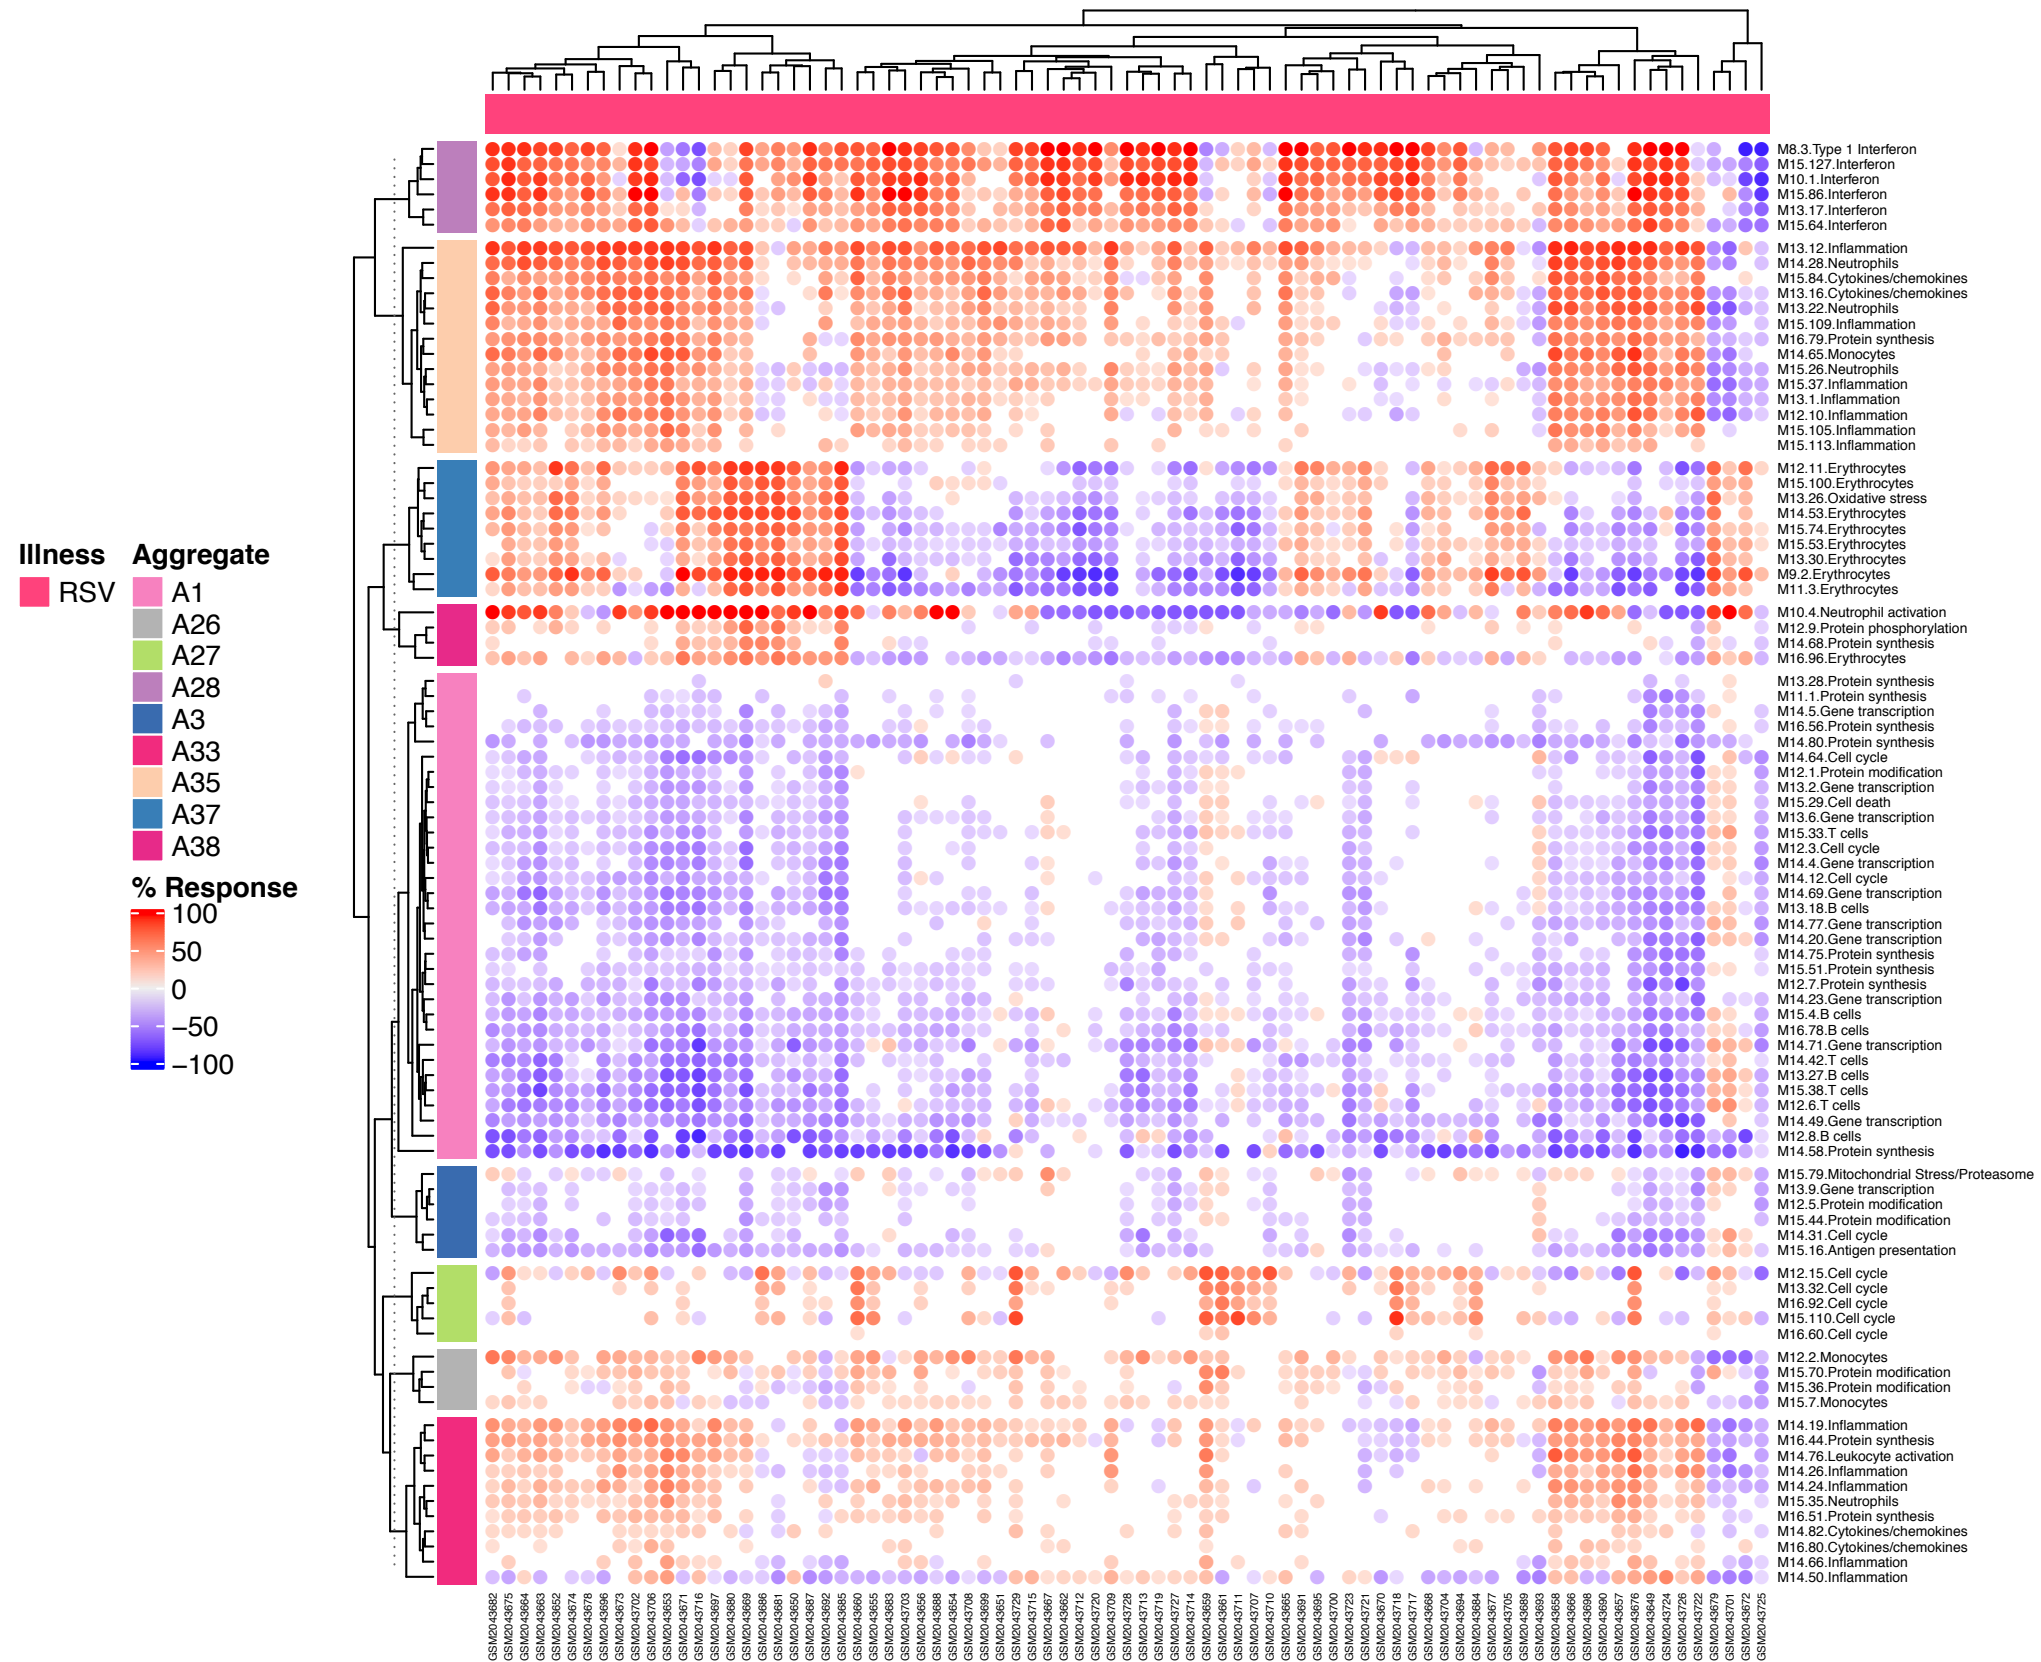

# GSE38900

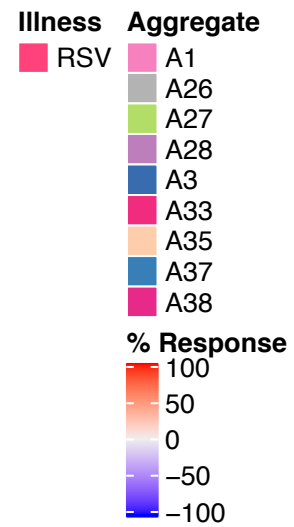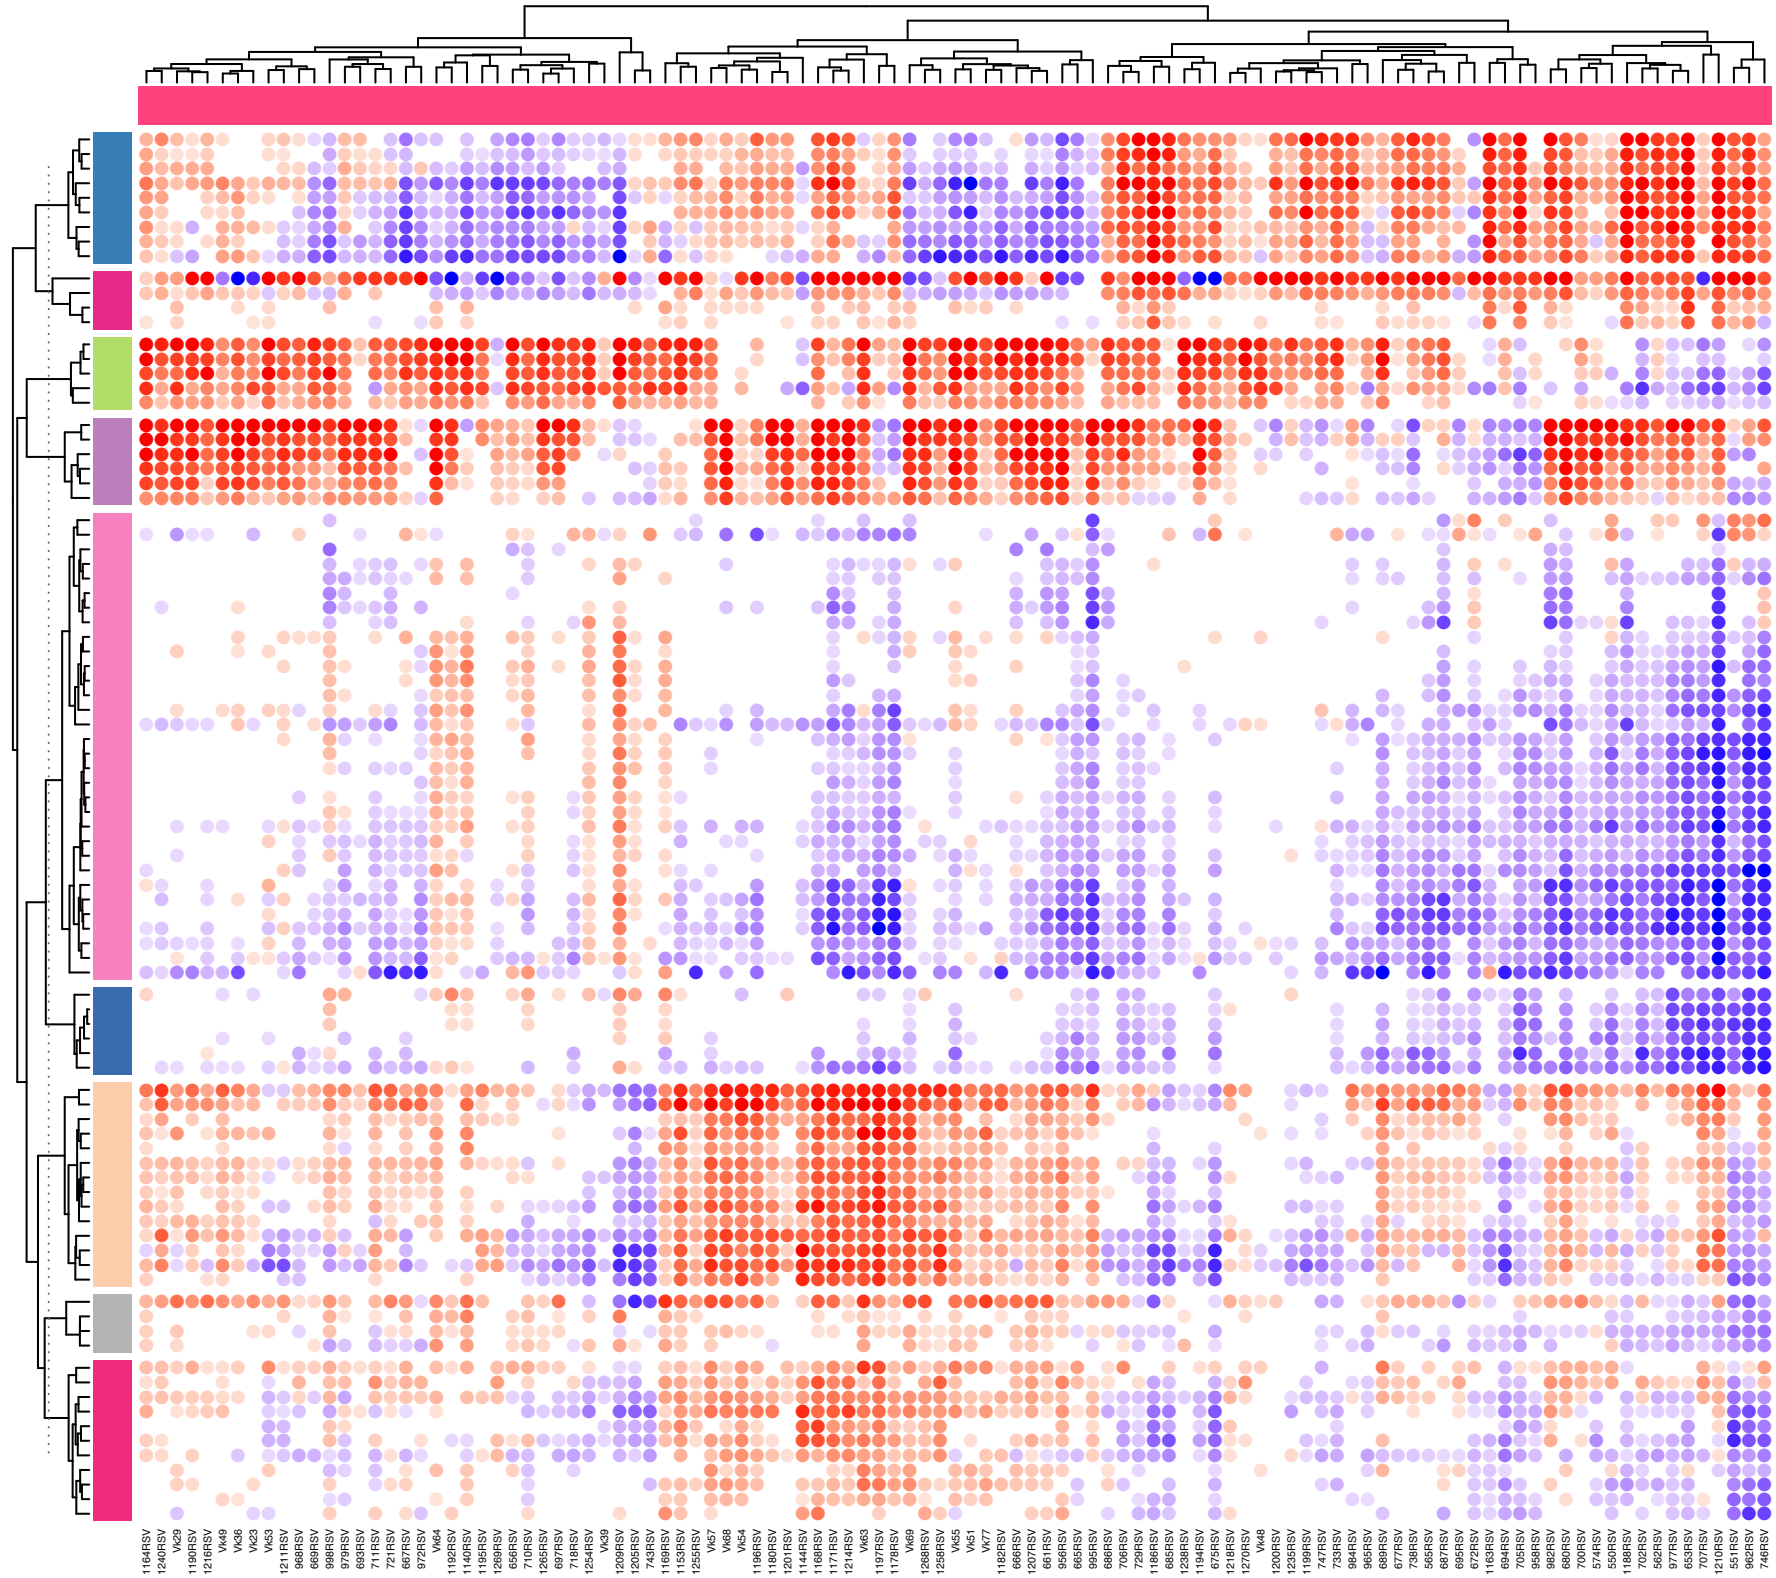

- M12.11.Erythrocytes
- M13.26.Oxidative stress
- M15.100.Erythrocytes
- M9.2.Erythrocytes
- M15.74.Erythrocytes
- M14.53.Erythrocytes
- M13.30.Erythrocytes
- M15.53.Erythrocytes
- M11.3.Erythrocytes
- M10.4.Neutrophil activation
- M16.96.Erythrocytes
- M14.69.Protein synthesis
- M12.9.Protein phosphorylation
- M13.32.Cell cycle
- M16.92.Cell cycle
- M15.110.Cell cycle
- M12.15.Cell cycle
- M16.60.Cell cycle
- M8.3.Type 1 Interferon
- M15.127.Interferon
- M10.1.interferon
- M15.86.interferon
- M13.17.interferon
- M15.64.interferon
- M14.80.Protein synthesis
- M14.58.Protein synthesis
- M13.28.Protein synthesis
- M15.51.Protein synthesis
- M16.56.Protein synthesis
- M11.1.Protein synthesis
- M12.7.Protein synthesis
- M14.75.Protein synthesis
- M14.23.Gene transcription
- M14.5.Gene transcription
- M12.1.Protein modification
- M14.20.Gene transcription
- M13.6.Gene transcription
- M14.64.Cell cycle
- M14.49.Gene transcription
- M14.12.Cell cycle
- M12.3.Cell cycle
- M14.4.Gene transcription
- M13.2.Gene transcription
- M15.33.T cells
- M13.18.B cells
- M14.77.Gene transcription
- M15.29.Cell death
- M15.4.B cells
- M14.69.Gene transcription
- M14.42.T cells
- M15.36.T cells
- M13.27.B cells
- M12.6.T cells
- M16.78.B cells
- M14.71.Gene transcription
- M12.8.B cells
- M15.79.Mitochondrial Stress/Proteasome
- M13.9.Gene transcription
- M12.5.Protein modification
- M15.44.Protein modification
- M14.31.Cell cycle
- M15.16.Antigen presentation
- M13.12.Inflammation
- M14.28.Neutrophils
- M15.113.Inflammation
- M14.65.Monocytes
- M15.105.Inflammation
- M15.37.Inflammation
- M15.26.Neutrophils
- M13.1.Inflammation
- M13.22.Neutrophils
- M16.79.Protein synthesis
- M15.84.Cytokines/chemokines
- M15.109.Inflammation
- M13.16.Cytokines/chemokines
- M12.10.Inflammation
- M12.2.Monocytes
- M15.36.Protein modification
- M15.7.Monocytes
- M15.70.Protein modification
- M14.82.Cytokines/chemokines
- M14.50.Inflammation
- M16.44.Protein synthesis
- M14.19.Inflammation
- M14.26.Inflammation
- M14.76.Leukocyte activation
- M16.80.Cytokines/chemokines
- M16.51.Protein synthesis
- M14.24.Inflammation
- M15.35.Neutrophils
- M14.66.Inflammation

1164RSV 1240RSV Vx29 1190RSV 1216RSV Vx49 Vx36 Vx23 Vx53 1211RSV 968RSV 998RSV 979RSV 692RSV 711RSV 721RSV 974RSV 976RSV Vx44 1192RSV 1140RSV 1195RSV 1269RSV 656RSV 710RSV 1235RSV 697RSV 718RSV 1254RSV Vx39 1209RSV 1205RSV 748RSV 1169RSV 1153RSV 1255RSV Vx57 Vx68 Vx64 1198RSV 1180RSV 1201RSV 1146RSV 1188RSV 1171RSV 1214RSV Vx63 1197RSV Vx69 1268RSV 1258RSV Vx55 Vx51 Vx77 1182RSV 666RSV 1207RSV 661RSV 956RSV 665RSV 995RSV 686RSV 708RSV 729RSV 1186RSV 685RSV 1238RSV 1173RSV 678RSV 1218RSV 1270RSV Vx48 1200RSV 1235RSV 1199RSV 747RSV 739RSV 844RSV 964RSV 689RSV 677RSV 738RSV 566RSV 687RSV 696RSV 672RSV 1163RSV 694RSV 706RSV 958RSV 982RSV 680RSV 709RSV 705RSV 1188RSV 702RSV 569RSV 677RSV 653RSV 707RSV 1210RSV 551RSV 962RSV 748RSV



# GSE42026

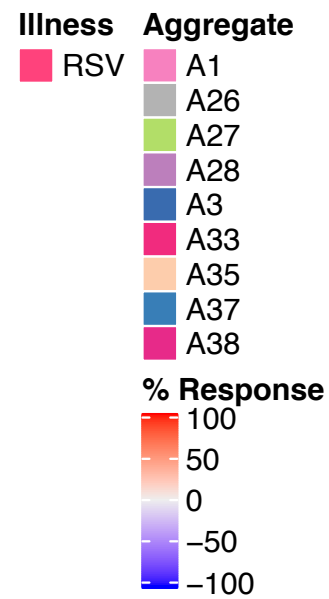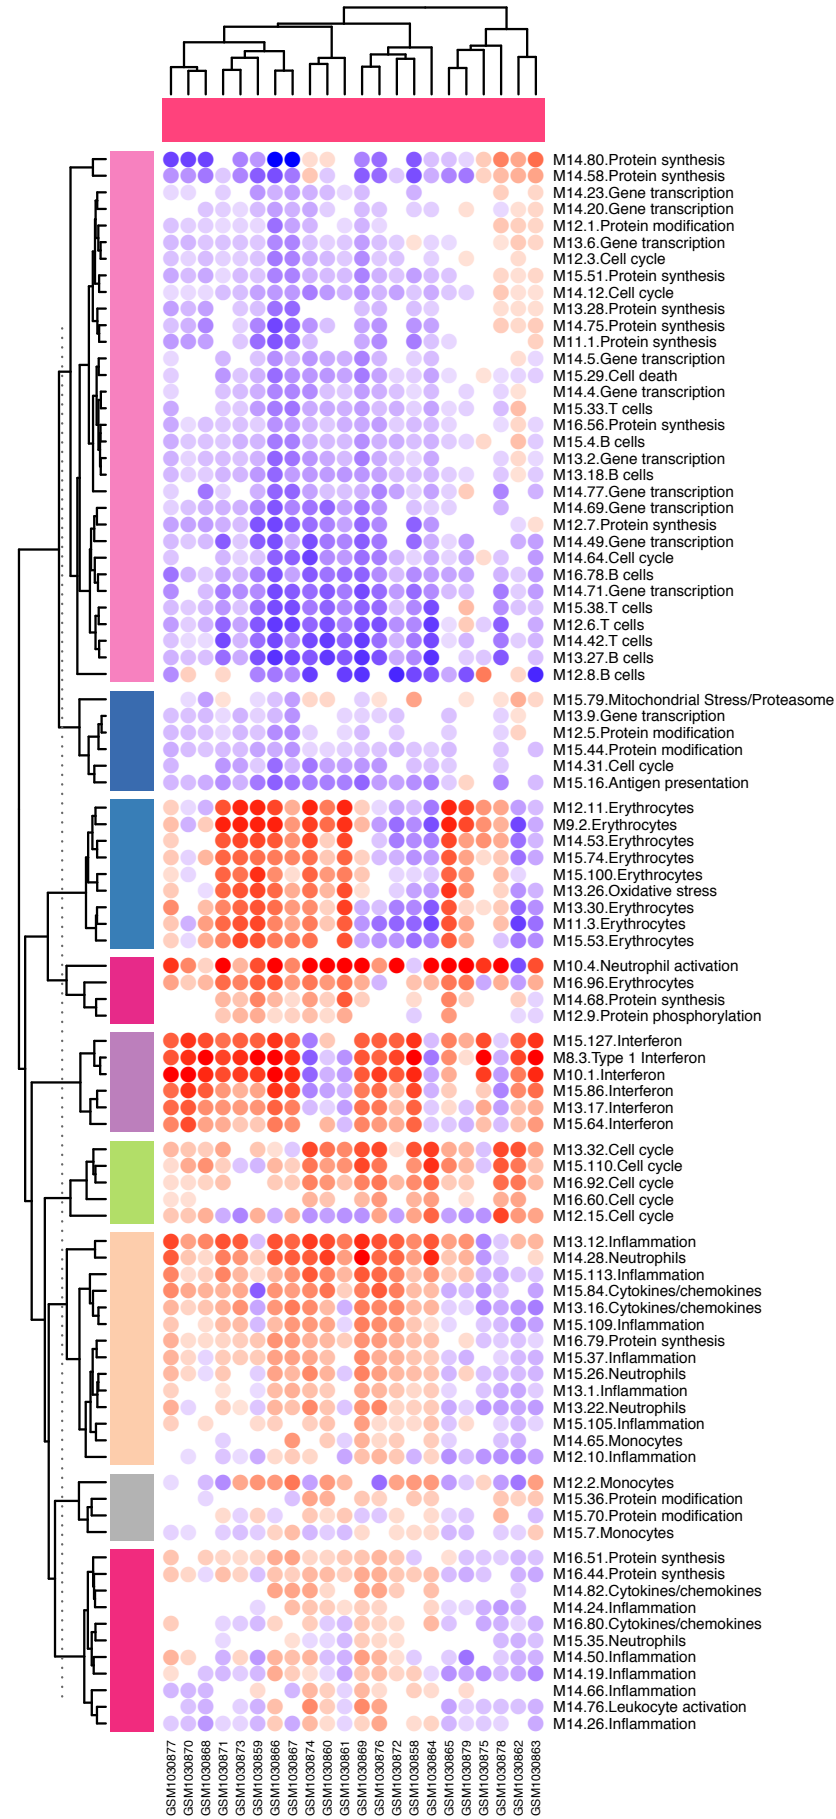

# GSE80179

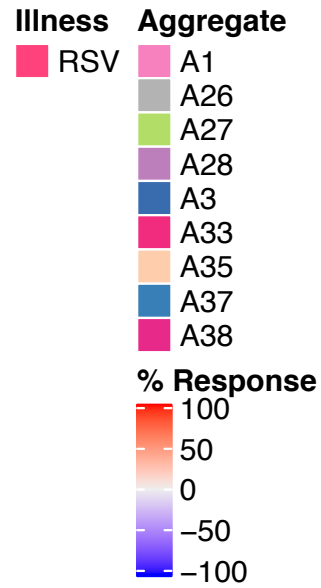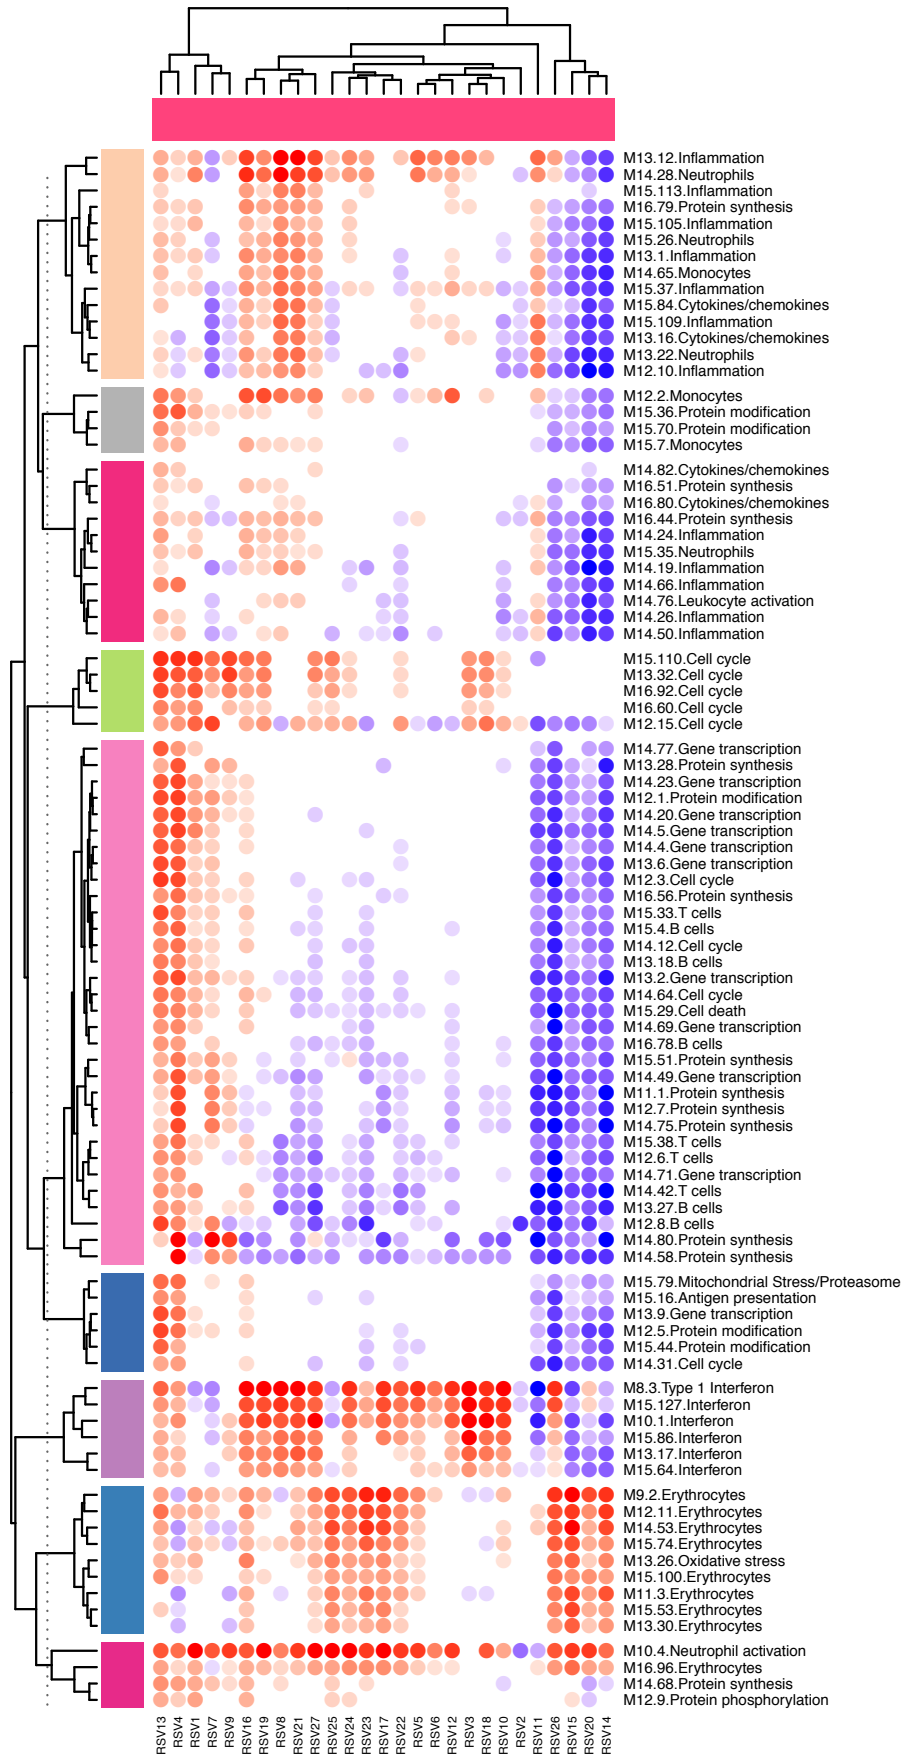

# GSE73072

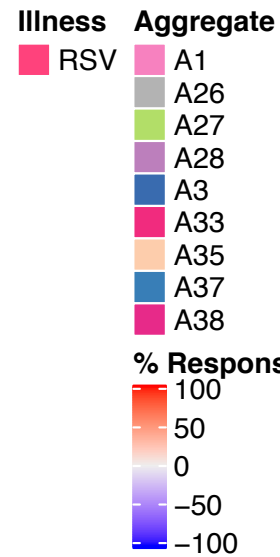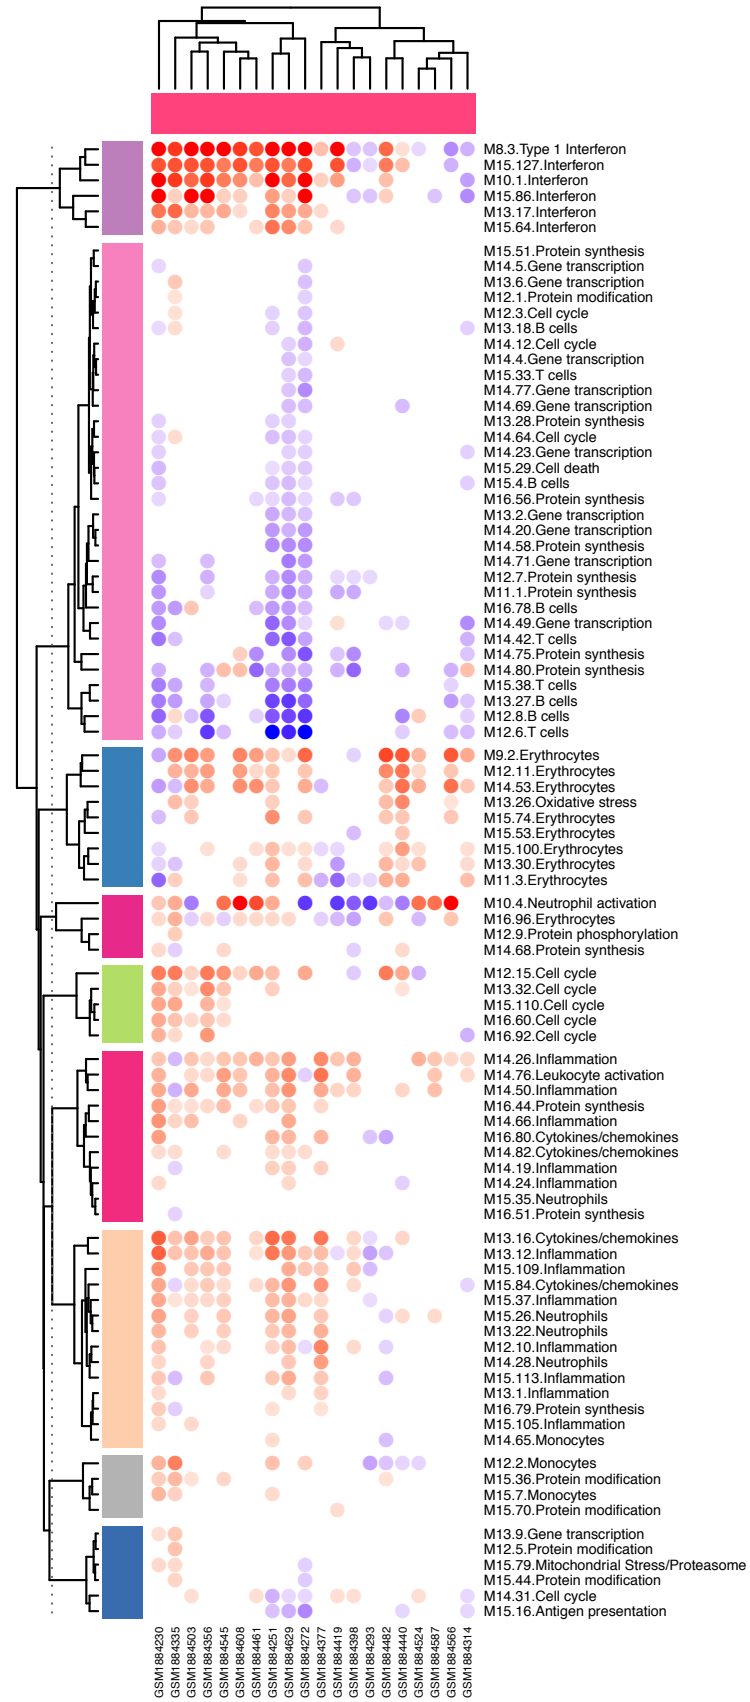

Supplement: CTM2-10-e244-s001.pdf [file CTM2-10-e244-s001.pdf]
